# Supplementary material
Source: PubMed Central journal article supplement (PMC5672633)
Supplement: NIHMS890858-supplement.pdf [file NIHMS890858-supplement.pdf]

## **Supplemental Information**

**Indoleacrylic acid produced by commensal *Peptostreptococcus* species suppresses inflammation**

**Marta Wlodarska, Chengwei Luo, Raivo Kolde, Eva d’Hennezel, John W. Annand, Courtney E. Heim, Philipp Krastel, Esther K. Schmitt, Abdifatah S. Omar, Elizabeth A. Creasey, Ashley L. Garner, Sina Mohammadi, Daniel J. O’Connell, Sahar Abubucker, Timothy D. Arthur, Eric A. Franzosa, Curtis Huttenhower, Leon O. Murphy, Henry J. Haiser, Hera Vlamakis, Jeffrey A. Porter, Ramnik J. Xavier**

## Supplemental Figure Legends

### **Figure S1. Genes involved in microbial mucin utilization in 90 HMP subjects. Related to Figure 1, Table 1, and Table S1.**

(A) HMP subject IDs used for analysis.

(B) Heat map showing RPKM of the most abundant genes, shown as UniProt IDs, including cleavage enzymes (black) and transporters (red) found in 90 fecal metagenomic samples from HMP subjects.

Asterisks indicate fucosidases or fucose transporter genes. See Supplemental Table 1 for gene list. Red branch in column dendrogram indicates distinct HMP subject.

### **Figure S2. Gene expression profiling and bacterial abundance after repeated bacterial gavage.**

#### **Related to Figure 3.**

Mice were orally gavaged with PBS, *A. muciniphila*, *C. butyricum*, or *P. russellii* every other day for 2 weeks and the distal large intestine was harvested for analysis.

(A) Quantitative RT-PCR showing expression of genes regulating goblet cell differentiation, *Agr2* (\*\* $P = 0.0021$ ), stem cell differentiation into secretory cell lineages, *Spedf* (\*\* $P = 0.0048$ ), *Atoh1*, *Gfi1* ( $*P = 0.0347$ ), *Hes1* ( $*P = 0.0118$ ), and stem cell differentiation into endocrine cells, *Ngn3*.

(B) Quantitative RT-PCR showing expression of goblet cell-encoded glycosyltransferase enzymes *Fut2* ( $*P = 0.0382$ ), *St6gall* (\*\* $P = 0.0024$ ), and *B3gnt6* in the distal colon,  $n = 9-10$  per group. Data pooled from 2 independent experiments.

(C) Quantitative RT-PCR showing the abundance of a *P. russellii* species-specific gene (HD superfamily hydrolase, copies per 10 ng total DNA) and total bacterial (16S rRNA copies per 10 ng DNA) in feces from PBS or *P. russellii*-treated mice,  $n = 9-10$  per group ( $*P = 0.0218$ ). Data pooled

from 2 independent experiments.

**Figure S3. Ion chromatograms and CID-MS spectra for identification of IPA, IA, and HPPA.**

**Related to Figure 4.**

(A-C) MS QTOF analysis of culture supernatant from *Peptostreptococcus* species shows the production of IPA (A), IA (B), and HPPA (C). Ion chromatograms extracted at  $m/z$  and retention time of IPA ( $m/z$  190.0873), IA ( $m/z$  188.0711), and HPPA ( $m/z$  167.0711) are shown. Red, *P. anaerobius*; black, *P. russellii*; blue, *P. stomatis*. Data representative of 3 experiments.

(D-F), CID-MS spectra of IPA (D), IA (E), and HPPA (F).

**Figure S4. Effects of IPA, IA, and HPPA on the colonic spheroid co-culture system and macrophages. Related to Figure 4.**

(A) Representative light phase images of spheroids treated with 100  $\mu$ M of each metabolite for 72 h compared to 0.1% DMSO control, scale bars = 200 $\mu$ m.

(B) Quantitative RT-PCR showing expression of glycosyltransferase enzymes  $\beta$  galactoside  $\alpha$ -2,6 sialyltransferase 1 (*St6gal1*; \* $P$  = 0.0376), and the core 1 synthase, glycoprotein-N-acetylgalactosamine 3-beta-galactosyltransferase, 1 (*C1galt1*; \* $P$  = 0.0477), relative to *Actb* and compared to 0.1% DMSO control. Data pooled from 2 independent experiments using 4-5 independent colonic spheroid lines. Significance determined using one-way ANOVA with Dunnett post-test and expressed as mean + SEM.

(C) Representative light phase images of spheroids cultured for 2 days in the presence of 100  $\mu$ M metabolite followed by stimulation for 20 h with 20 ng/mL LPS. Rows represent increasing magnification (5X and 40X), scale bars = 200 $\mu$ m. Arrows point to macrophages with extended pseudopods.

(D) IL-10 ( $***P = 0.0006$ ;  $**P = 0.003$ ), TNF ( $*P = 0.0384$ ), and IL-6 ( $*P = 0.0183$ ;  $***P = 0.0004$ ) production after 20 ng/mL LPS stimulation for 24 h in co-culture of large intestinal spheroids and BMDMs pre-treated for 48 h with 100  $\mu$ M of each metabolite or 0.1% DMSO control. Data are pooled from 2 independent experiments using 4-5 independent colonic spheroid lines. Significance determined using one-way ANOVA with Dunnett post-test and expressed as mean + SEM.

(E) Quantitative RT-PCR showing expression of AhR and PXR target genes, *Cyp1a1* and *Ugt1a1*, respectively, relative to *Actb* and compared to LPS-stimulated 0.1% DMSO control. Data pooled from 2 independent experiments using 4-5 independent colonic spheroid lines. Significance determined using one-way ANOVA with Dunnett post-test and expressed as mean + SEM.

**Figure S5. Relative abundance of mucin utilization genes and *fld* genes in PRISM cohort. Related to Figure 5.**

(A) Quantitative RT-PCR showing expression of NRF2 target genes heme oxygenase 1 (*Hmox1*;  $****P = 0.0001$ ;  $*P = 0.0154$ ), NADPH:quinone dehydrogenase 1 (*Nqo1*;  $****P = 0.0001$ ), glutamate-cysteine ligase, modifier subunit (*Gclm*;  $****P = 0.0001$ ), and glutamate-cysteine ligase, catalytic subunit (*Gclc*;  $****P = 0.0001$ ), relative to *Actb* and compared to LPS-stimulated 0.1% DMSO control. Data pooled from 2 independent experiments using 4-5 independent colonic spheroid lines. Significance determined using one-way ANOVA with Dunnett post-test and expressed as mean + SEM

(B) Relative activation of NRF2 by 300  $\mu$ M IPA, 300  $\mu$ M IA ( $**** P = 0.0001$ ), and 12.5  $\mu$ M tBHQ ( $**** P = 0.0001$ ) after overnight stimulation with 20 ng/mL LPS of RAW264.7 cells transduced with a NRF2-luciferase reporter. Data representative of 2 independent experiments; significance determined using one-way ANOVA and expressed as mean + SEM.

(C) Increased abundance of an  $\alpha$ -L-fucosidase (homologous to one encoded by *R. gnavus*) and a

peptidase E (homologous to one encoded by *Citrobacter koseri*) in CD patients compared to control individuals.

(D) Significantly increased abundance of monosaccharide transporter genes in CD patients compared to control individuals.

(E) RPKM of *fld* genes (color coded for different genes) in the PRISM cohort. Rows indicate different individuals.

# Figure S1

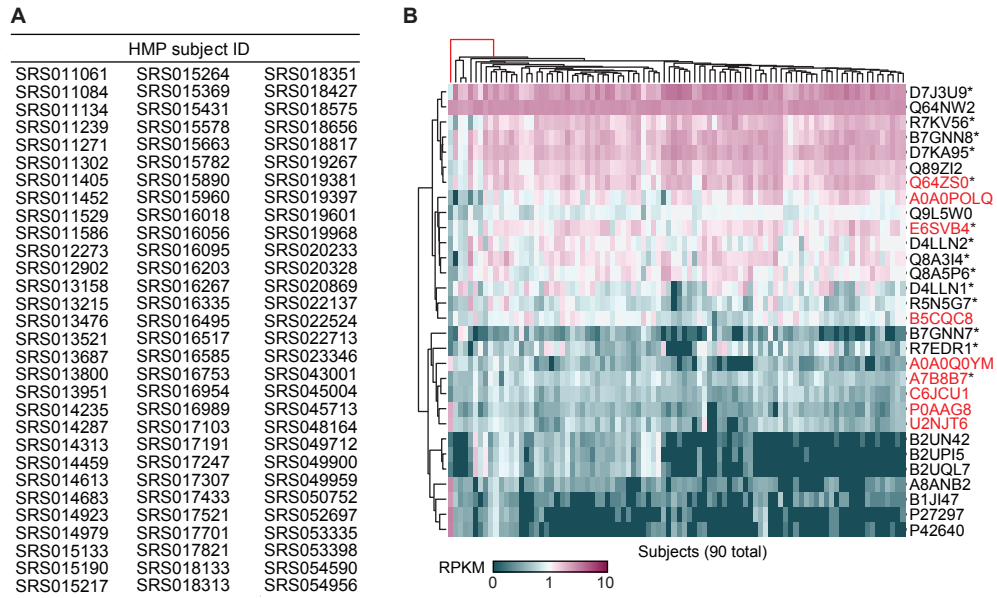

# Figure S2

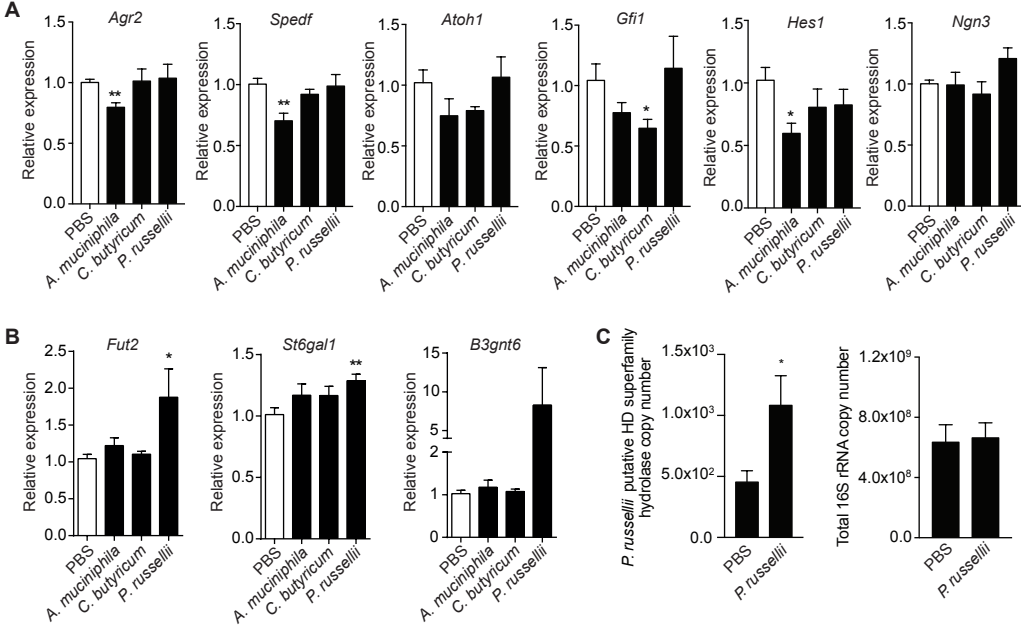

# Figure S3

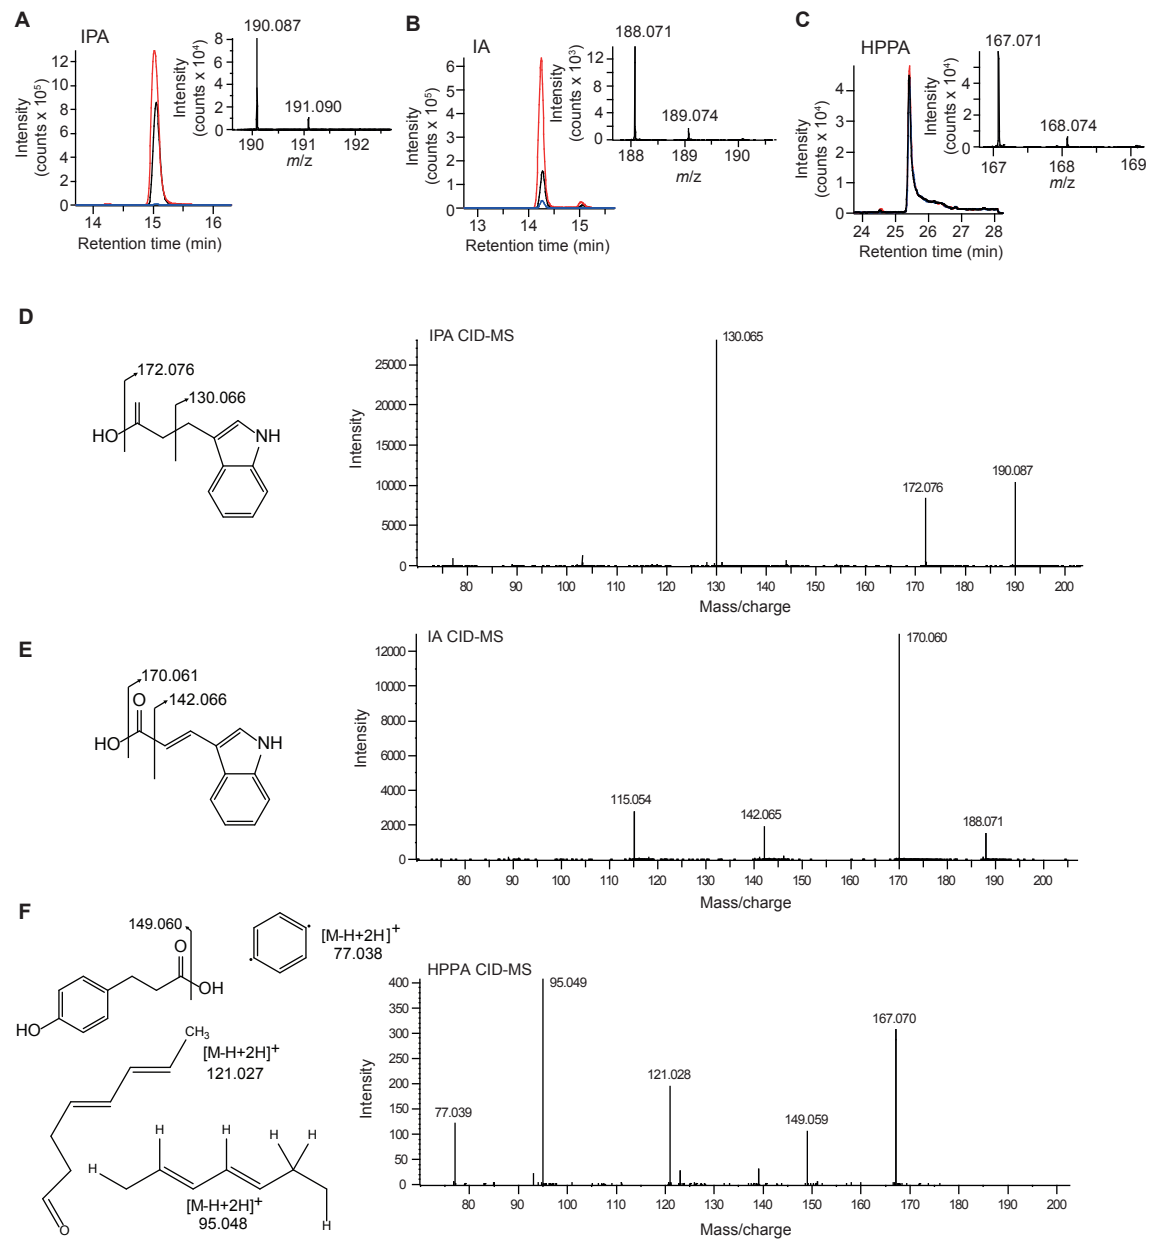



# Figure S4

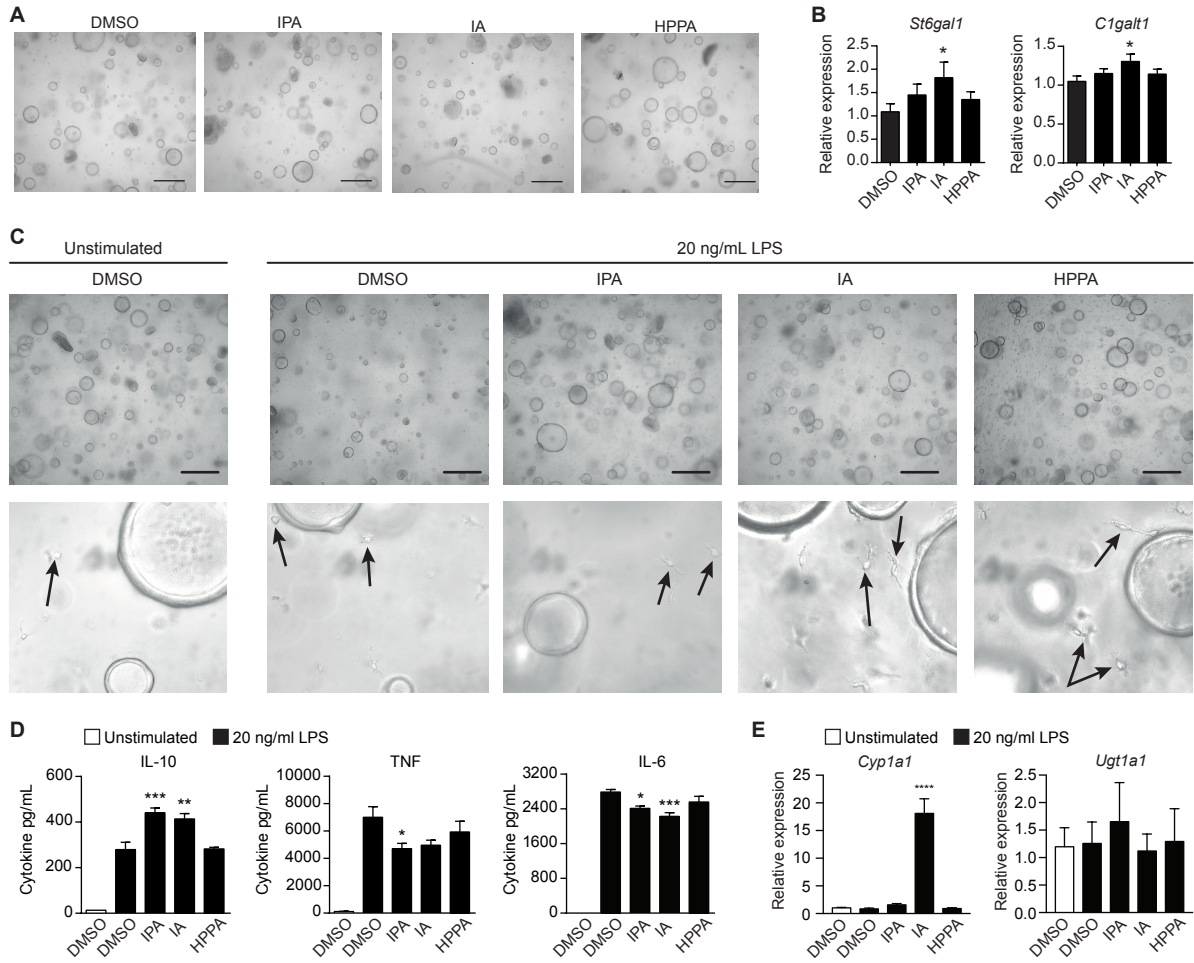

# Figure S5

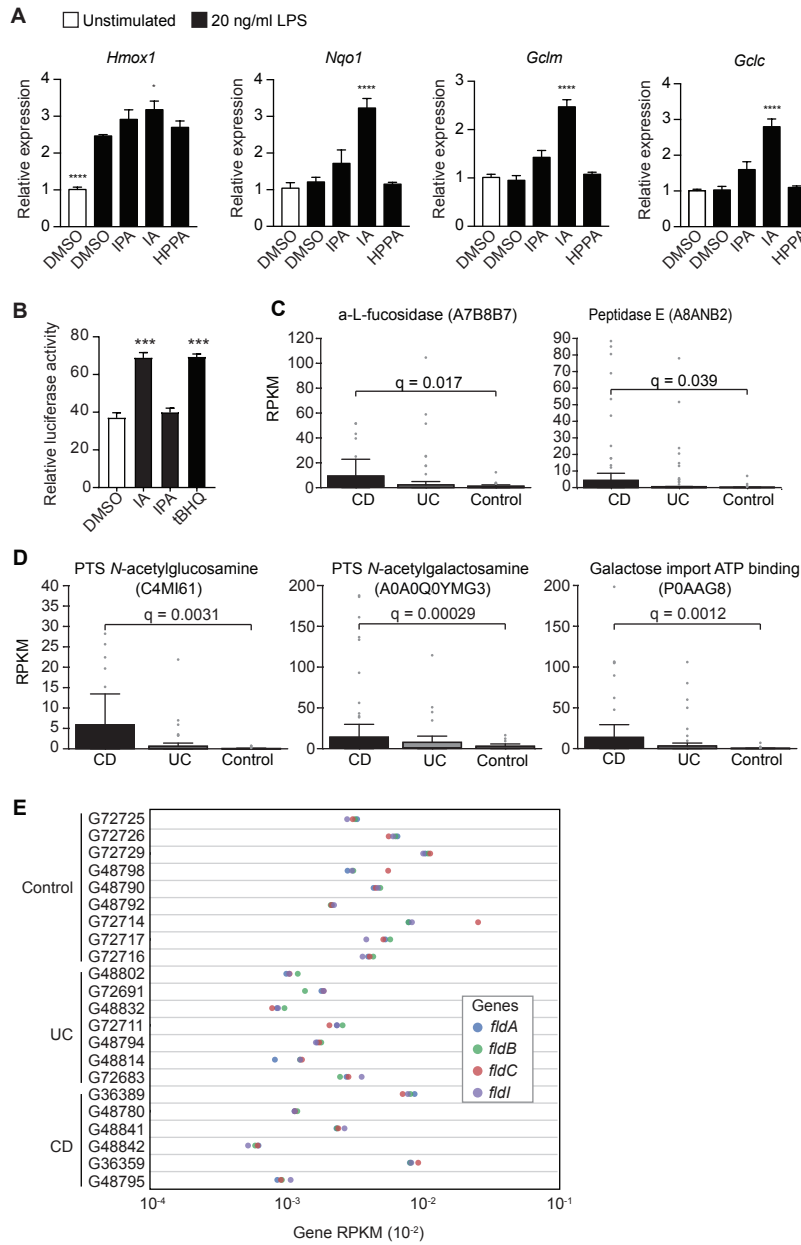

**Table S1. Seed genes used for computational analyses including transporter genes and cleavage genes. Related to Figure 1.**

**Transporter genes**

| Gene ID    | Description                                                  | Organism                           |
|------------|--------------------------------------------------------------|------------------------------------|
| A0A015XFR8 | H+ symporter permease                                        | <i>Bacteroides fragilis</i>        |
| Q64ZS0     | L-fucose permease                                            | <i>Bacteroides fragilis</i>        |
| E6SVB4     | L-fucose transporter                                         | <i>Bacteroides helcogenes</i>      |
| R5TBE0     | Transporter putative fucose permease                         | <i>Clostridium hathewayi</i>       |
| A0A0H2YS94 | L-fucose:H+ symporter permease                               | <i>Clostridium perfringens</i>     |
| A0A0C7TE87 | L-fucose permease                                            | <i>Clostridium sordellii</i>       |
| A0A0D6CKJ0 | Putative sialic acid ABC transporter permease component      | <i>Bifidobacterium breve</i>       |
| D4BLW0     | ABC transporter, ATP-binding protein                         | <i>Bifidobacterium breve</i>       |
| A0A0N9KQA4 | Putative sialic acid transporter                             | <i>Clostridium perfringens</i>     |
| A0A0F0CAG7 | Sialic acid TRAP transporter permease protein SiaT           | <i>Clostridium sp. FS41</i>        |
| P0AAG8     | Galactose/methyl galactoside import ATP-binding protein MglA | <i>Escherichia coli</i>            |
| C6JCU1     | Galactose/methyl galactoside import ATP-binding protein MglA | <i>Ruminococcus sp. 5_1_39BFAA</i> |
| A0A0Q0YMG3 | PTS N-acetylgalactosamine transporter subunit IID            | <i>Clostridium butyricum</i>       |
| A0A09919R0 | PTS acetylgalactosamine transporter subunit IID              | <i>Clostridium innocuum</i>        |
| A0A0P0LQS4 | N-acetylglucosamine related transporter, NagX                | <i>Bacteroides vulgatus</i>        |
| A0A0H2NL40 | PTS N-acetylglucosamine transporter subunit IIABC            | <i>Bifidobacterium bifidum</i>     |
| A0A0M0AEZ4 | PTS N-acetylglucosamine transporter subunit IIABC            | <i>Clostridium botulinum</i>       |
| C4IM61     | Pts system, N-acetylglucosamine-specific iIBC component      | <i>Clostridium butyricum</i>       |
| A0A09918F5 | PTS N-acetylglucosamine transporter subunit IIBC             | <i>Clostridium innocuum</i>        |
| B1BM12     | PTS system, N-acetylglucosamine-specific IIBC component      | <i>Clostridium perfringens</i>     |
| A0A0H2YS35 | PTS system, N-acetylglucosamine-specific IIBC component      | <i>Clostridium perfringens</i>     |
| A0A0C7R356 | Pts system                                                   | <i>Clostridium sordellii</i>       |
| B5CQC8     | PTS system, N-acetylglucosamine-specific IIBC component      | <i>Ruminococcus lactaris</i>       |
| A0A0L0LQG2 | PTS mannose transporter subunit IIABC                        | <i>Bifidobacterium breve</i>       |
| A0A09914W2 | PTS mannose transporter subunit IID                          | <i>Clostridium innocuum</i>        |
| U2NJT6     | PTS system mannose-specific transporter subunit IID          | <i>Clostridium intestinale</i>     |
| A0A0D8VYR1 | PTS mannose transporter subunit IIA                          | <i>Escherichia coli</i>            |

**Cleavage genes**

| Gene ID | Description                                        | Organism                             |
|---------|----------------------------------------------------|--------------------------------------|
| Q89Z12  | O-GlcNAcase BT_4395                                | <i>Bacteroides thetaiotaomicron</i>  |
| P0CB39  | Phosphoethanolamine transferase EptC               | <i>Escherichia coli</i>              |
| Q64NW2  | ATP-dependent Clp protease proteolytic subunit     | <i>Bacteroides fragilis</i>          |
| Q0TR53  | O-GlcNAcase NagJ                                   | <i>Clostridium perfringens</i>       |
| Q97QL9  | 6-phospho-beta-galactosidase 2                     | <i>Streptococcus pneumoniae</i>      |
| Q6RUF5  | Blood-group-substance endo-1,4-beta-galactosidase  | <i>Clostridium perfringens</i>       |
| P29768  | Sialidase                                          | <i>Salmonella typhimurium</i>        |
| B2UQL7  | Glycosyl hydrolase family 109 protein 2            | <i>Akkermansia muciniphila</i>       |
| P0C6E9  | Sialidase                                          | <i>Vibrio cholerae</i>               |
| P27297  | Protein bax                                        | <i>Escherichia coli</i>              |
| Q8XM24  | Probable alpha-N-acetylglucosaminidase             | <i>Clostridium perfringens</i>       |
| Q8A3I4  | Alpha-L-fucosidase                                 | <i>Bacteroides thetaiotaomicron</i>  |
| A5F7A4  | Sialidase                                          | <i>Vibrio cholerae</i>               |
| B2UL12  | Alpha-1,3-galactosidase A                          | <i>Akkermansia muciniphila</i>       |
| A8ANB2  | Peptidase E                                        | <i>Citrobacter koseri</i>            |
| Q8A5P6  | Putative lipoprotein                               | <i>Bacteroides thetaiotaomicron</i>  |
| B3TLD6  | Lacto-N-biosidase                                  | <i>Bifidobacterium bifidum</i>       |
| B7GNN8  | Alpha-1,3/4-fucosidase, putative                   | <i>Bifidobacterium longum subsp.</i> |
| Q3T552  | Endo-alpha-N-acetylgalactosaminidase               | <i>Bifidobacterium longum subsp.</i> |
| Q8XMG4  | Exo-alpha-sialidase                                | <i>Clostridium perfringens</i>       |
| B7GUN8  | Beta-galactosidase                                 | <i>Bifidobacterium longum subsp.</i> |
| Q8XMJ5  | Uncharacterized protein                            | <i>Clostridium perfringens</i>       |
| B7GNN6  | Glycoside hydrolase family 2, TIM barrel           | <i>Bifidobacterium longum subsp.</i> |
| D7KA95  | Alpha-L-fucosidase 1                               | <i>Bacteroides sp. 3_1_23</i>        |
| Q0Z153  | Beta-galactosidase                                 | <i>Bifidobacterium bifidum</i>       |
| B7GNN7  | Uncharacterized protein                            | <i>Bifidobacterium longum subsp.</i> |
| A5A215  | Beta-galactosidase                                 | <i>Bifidobacterium bifidum</i>       |
| Q0Z117  | Beta-galactosidase                                 | <i>Bifidobacterium bifidum</i>       |
| B5UB72  | Endo-alpha-N-acetylgalactosaminidase (Fragment)    | <i>Enterococcus faecalis</i>         |
| R7HQQ2  | Alpha-L-fucosidase                                 | <i>Ruminococcus sp. CAG:90</i>       |
| A4K5H9  | Beta-galactosidase BbgIII                          | <i>Bifidobacterium bifidum</i>       |
| B7GN40  | Alpha-L-fucosidase                                 | <i>Bifidobacterium longum subsp.</i> |
| B7GUD7  | Beta-galactosidase                                 | <i>Bifidobacterium longum subsp.</i> |
| B7GTT5  | Alpha-L-fucosidase                                 | <i>Bifidobacterium longum subsp.</i> |
| A7B557  | BNR/Asp-box repeat protein                         | <i>Ruminococcus gnavus</i>           |
| A7B8B7  | Alpha-L-fucosidase                                 | <i>Ruminococcus gnavus</i>           |
| B7GNW4  | Beta-galactosidase                                 | <i>Bifidobacterium longum subsp.</i> |
| D7J3U9  | Alpha-L-fucosidase 2                               | <i>Bacteroides sp. D22</i>           |
| B2UPI5  | Exo-alpha-sialidase                                | <i>Akkermansia muciniphila</i>       |
| B2UN42  | Exo-alpha-sialidase                                | <i>Akkermansia muciniphila</i>       |
| Q9L5W0  | Mucin-desulfating sulfatase MdsA                   | <i>Prevotella sp. RS2</i>            |
| Q5MAH5  | Mucin-desulfating glycosidase                      | <i>Prevotella sp. RS2</i>            |
| D4LLN2  | Alpha-L-fucosidase                                 | <i>Ruminococcus sp. SR1/5</i>        |
| D4LLN1  | Alpha-L-fucosidase                                 | <i>Ruminococcus sp. SR1/5</i>        |
| R7KV56  | Alpha-L-fucosidase                                 | <i>Bacteroides thetaiotaomicron</i>  |
| R5N5G7  | Alpha-L-fucosidase                                 | <i>Ruminococcus sp. CAG:17</i>       |
| R5MZG0  | Glycoside hydrolase family 29 (Alpha-L-fucosidase) | <i>Ruminococcus sp. CAG:17</i>       |
| R7EDR1  | Alpha-L-fucosidase                                 | <i>Roseburia sp. CAG:471</i>         |
| P77848  | Sialidase (Neuraminidase)                          | <i>Clostridium tertium</i>           |
| O82882  | Metalloprotease StcE                               | <i>Escherichia coli</i>              |
| Q48259  | Zinc metalloprotease (Fragment)                    | <i>Helicobacter pylori</i>           |
| Q7BS42  | Serine protease pic autotransporter                | <i>Escherichia coli</i>              |
| Q8CWC7  | Serine protease pic autotransporter                | <i>Escherichia coli</i>              |
| Q8CWC7  | Serine protease pic autotransporter                | <i>Escherichia coli</i>              |
| Q57450  | Enterotoxin 1                                      | <i>Shigella flexneri</i>             |
| B1JI47  | Beta-hexosaminidase                                | <i>Yersinia pseudotuberculosis</i>   |
| Q7CPC0  | Phosphoethanolamine transferase CptA               | <i>Salmonella typhimurium</i>        |
| Q7A113  | Lipoteichoic acid synthase                         | <i>Staphylococcus aureus</i>         |
| P42640  | Putative phosphoethanolamine transferase YhbX      | <i>Escherichia coli</i>              |
| P39349  | Putative phosphoethanolamine transferase YjgX      | <i>Escherichia coli</i>              |

**Table S2. Oligonucleotides used for gene expression studies.**

| <b>Gene ID</b> | <b>Source</b> | <b>Assay ID</b> |
|----------------|---------------|-----------------|
| Gapdh          | Invitrogen    | Mm99999915      |
| Actb           | Invitrogen    | Mm02619580      |
| Ki67           | Invitrogen    | Mm01278617      |
| Muc2           | Invitrogen    | Mm01276696      |
| IL10           | Invitrogen    | Mm01288386      |
| IL22           | Invitrogen    | Mm01226722      |
| Tnf            | Invitrogen    | Mm00443258      |
| Fut2           | Invitrogen    | Mm00490152      |
| B3gnt6         | Invitrogen    | Mm04204642      |
| C1galt1        | Invitrogen    | Mm01167001      |
| St6gal1        | Invitrogen    | Mm00486119      |
| Spedf          | Invitrogen    | Mm00600221      |
| Cyp1a1         | Invitrogen    | Mm00487218      |
| Ugt1a1         | Invitrogen    | Mm02603337      |
| Abcb1b (Mdr-1) | Invitrogen    | Mm00440736      |
| Hmox1          | Invitrogen    | Mm00516005      |
| Gclm           | Invitrogen    | Mm00514996      |
| Gclc           | Invitrogen    | Mm00802655      |
| Nqo1           | Invitrogen    | Mm01253561      |
